# Supplementary material
Source: Springer Nature journal article supplement (https://www.springermedizin.de/resource/supplementary/13229_2013_119_MOESM3_ESM.pdf/9676210)

(A)

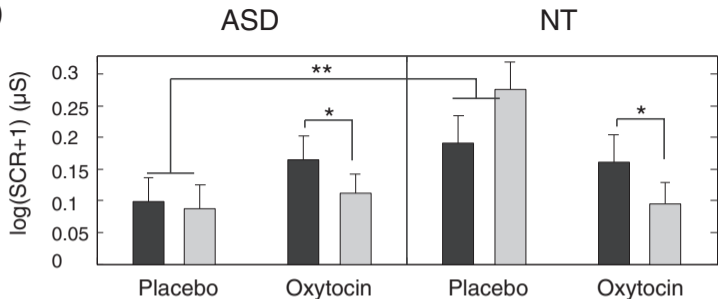

(B)

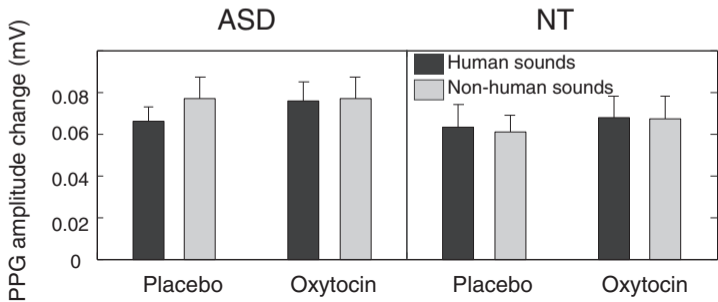

Supplement: MOESM3 [file 9676210]
